# Supplementary material for: A comparative life cycle analysis of electromicrobial production systems
Source: Royal Society of Chemistry journal article supplement (doi:10.1039/d2ee00569g), 2022-01-01
Supplement: d2ee00569g1.pdf [file d2ee00569g1.pdf]

## Supplementary information

### A comparative life cycle analysis of electromicrobial production systems

#### Authors

Anthony J. Abel,<sup>1,†</sup> Jeremy D. Adams,<sup>1,†</sup> Douglas S. Clark<sup>1,2,\*</sup>

#### Affiliations

1. Department of Chemical and Biomolecular Engineering, University of California, Berkeley, CA 94720, USA
2. Molecular Biophysics and Integrated Bioimaging Division, Lawrence Berkeley National Laboratory, 1 Cyclotron Road, Berkeley, CA 94720, USA

<sup>†</sup>These authors contributed equally.

\*Correspondence should be addressed to D.S.C ([dsc@berkeley.edu](mailto:dsc@berkeley.edu))

#### Supplementary tables

**Table S1. Base case model parameters**

| Parameter                           | Value                                                                       | Units                 | References           |
|-------------------------------------|-----------------------------------------------------------------------------|-----------------------|----------------------|
| Operating conditions                |                                                                             |                       |                      |
| $P_{\text{CO}_2}$                   | 0.2                                                                         | atm                   | --                   |
| $D_{\text{gas}}$                    | 100                                                                         | hr <sup>-1</sup>      | --                   |
| $T$                                 | 30 ( <i>C. necator</i> )<br>35 ( <i>S. ovata</i> )<br>37 ( <i>E. coli</i> ) | °C                    | DSMZ<br>DSMZ<br>DSMZ |
| Microbial growth                    |                                                                             |                       |                      |
| <i>C. necator</i> (formatotrophy)   |                                                                             |                       |                      |
| $\mu_{\text{max,opt}}$              | 0.18                                                                        | hr <sup>-1</sup>      | 1                    |
| $Y'_{\text{X/F,maz}}$               | 0.169                                                                       | mol mol <sup>-1</sup> | 1                    |
| $Y'_{\text{L/F,maz}}$               | 0.11                                                                        | mol mol <sup>-1</sup> | calculated           |
| $\theta_{\text{F}}$                 | 75.11                                                                       | mM                    | 1                    |
| $K_{\text{S,F}}$                    | 10                                                                          | μM                    | 2                    |
| $K_{\text{S,O}_2}$                  | 2.5                                                                         | μM                    | 3                    |
| pH <sub>opt</sub>                   | 7                                                                           | --                    | 1                    |
| pH <sub>min</sub>                   | 4                                                                           | --                    | 4                    |
| pH <sub>max</sub>                   | 9                                                                           | --                    | 4                    |
| $c_{\text{Na,min}}$                 | 0.2                                                                         | M                     | 5                    |
| $c_{\text{Na,max}}$                 | 1.05                                                                        | M                     | 5                    |
| <i>C. necator</i> (hydrogenotrophy) |                                                                             |                       |                      |
| $\mu_{\text{max,opt}}$              | 0.18                                                                        | hr <sup>-1</sup>      | 6                    |
| $Y'_{\text{X/H}_2}$                 | 0.19                                                                        | mol mol <sup>-1</sup> | 6                    |
| $Y'_{\text{L/H}_2}$                 | 0.11                                                                        | mol mol <sup>-1</sup> | calculated           |
| $K_{\text{S,H}_2}$                  | 20.4                                                                        | μM                    | 7                    |
| $K_{\text{S,O}_2}$                  | 2.5                                                                         | μM                    | 3                    |

|                                |                                                                   |                                   |            |
|--------------------------------|-------------------------------------------------------------------|-----------------------------------|------------|
| $K_{S,CO_2}$                   | 9.38                                                              | $\mu\text{M}$                     | 7          |
| $\text{pH}_{\text{opt}}$       | 7                                                                 | --                                | 1          |
| $\text{pH}_{\text{min}}$       | 4                                                                 | --                                | 4          |
| $\text{pH}_{\text{max}}$       | 9                                                                 | --                                | 4          |
| $c_{\text{Na,min}}$            | 0.2                                                               | M                                 | 5          |
| $c_{\text{Na,max}}$            | 1.05                                                              | M                                 | 5          |
| <i>S. ovata</i> (acetogenesis) |                                                                   |                                   |            |
| $\mu_{\text{max,opt}}$         | 0.044                                                             | $\text{hr}^{-1}$                  | 8          |
| $K_{S,H_2}$                    | 20                                                                | $\mu\text{M}$                     | 9          |
| $K_{S,CO_2}$                   | 20                                                                | $\mu\text{M}$                     | 9          |
| $n$                            | 0.47                                                              | --                                | 10         |
| $\text{pH}_{\text{opt}}$       | 7                                                                 | --                                | 8          |
| $\text{pH}_{\text{min}}$       | 4                                                                 | --                                | assumed    |
| $\text{pH}_{\text{max}}$       | 9                                                                 | --                                | assumed    |
| $c_{\text{Na,min}}$            | 0.2                                                               | M                                 | 5          |
| $c_{\text{Na,max}}$            | 1.05                                                              | M                                 | 5          |
| <i>E. coli</i> (acetotrophy)   |                                                                   |                                   |            |
| $\mu_{\text{max,opt}}$         | 0.3                                                               | $\text{hr}^{-1}$                  | 11         |
| $Y'_{X/Ac}$                    | 0.936                                                             | $\text{mol mol}^{-1}$             | 11         |
| $Y'_{L/Ac}$                    | 0.5                                                               | $\text{mol mol}^{-1}$             | calculated |
| $K_{S,O_2}$                    | 2.5                                                               | $\mu\text{M}$                     | 3          |
| $K_{S,Ac}$                     | 10                                                                | $\mu\text{M}$                     | assumed    |
| $K_{L,Ac}$                     | 0.83                                                              | M                                 | 12         |
| $\text{pH}_{\text{opt}}$       | 7                                                                 | --                                | 11         |
| $\text{pH}_{\text{min}}$       | 4                                                                 | --                                | 13–15      |
| $\text{pH}_{\text{max}}$       | 9.5                                                               | --                                | 13–15      |
| $c_{\text{Na,min}}$            | 0.2                                                               | M                                 | 5          |
| $c_{\text{Na,max}}$            | 1.05                                                              | M                                 | 5          |
| Acid/base reactions            |                                                                   |                                   |            |
| $S_5$                          | -71.0                                                             | $\text{J mol}^{-1} \text{K}^{-1}$ | 16         |
| $S_6$                          | -92.4                                                             | $\text{J mol}^{-1} \text{K}^{-1}$ | 16         |
| $S_w$                          | -80.66                                                            | $\text{J mol}^{-1} \text{K}^{-1}$ | 16         |
| $H_5$                          | -0.12                                                             | $\text{kJ mol}^{-1}$              | 16         |
| $H_6$                          | -0.4                                                              | $\text{kJ mol}^{-1}$              | 16         |
| $H_w$                          | 55.84                                                             | $\text{kJ mol}^{-1}$              | 16         |
| $K_7$                          | $1.38 \times 10^{-4}$                                             | $\text{mol L}^{-1}$               | 16         |
| $k_{+1}$                       | $\exp\left(1246.98 - \frac{6 \times 10^4}{T} - 183 \ln(T)\right)$ | $\text{s}^{-1}$                   | 17         |
| $k_{+2}$                       | 59.44                                                             | $\text{s}^{-1}$                   | 17         |
| $k_{+3}$                       | $2.23 \times 10^3$                                                | $\text{L mol}^{-1} \text{s}^{-1}$ | 17         |
| $k_{+4}$                       | $6.0 \times 10^9$                                                 | $\text{L mol}^{-1} \text{s}^{-1}$ | 17         |
| $k_{+5}$                       | 10                                                                | $\text{s}^{-1}$                   | assumed    |
| $k_{+6}$                       | 10                                                                | $\text{s}^{-1}$                   | assumed    |
| $k_{+7}$                       | 10                                                                | $\text{s}^{-1}$                   | assumed    |
| $k_{+w}$                       | $2.4 \times 10^{-5}$                                              | $\text{L mol}^{-1} \text{s}^{-1}$ | 18         |
| Gas/liquid mass transfer       |                                                                   |                                   |            |
| $k_L a_{O_2}$                  | 200                                                               | $\text{hr}^{-1}$                  | assumed    |
| $A_S$                          | 0.56                                                              | $\text{m}^{-1}$                   | assumed    |

### Diffusion coefficients

|            |                                                                                   |              |    |
|------------|-----------------------------------------------------------------------------------|--------------|----|
| $D_{CO_2}$ | $14.68 \times 10^{-9} \left( \frac{T}{217.206} - 1 \right)^{1.997}$               | $m^2 s^{-1}$ | 19 |
| $D_{H_2}$  | $\frac{2.290 \times 10^{-11}}{\mu^{0.819}} T$                                     | $m^2 s^{-1}$ | 2  |
| $D_{O_2}$  | $10^4 \left[ -8.410 + \frac{773.8}{T} - \left( \frac{506.4}{T} \right)^2 \right]$ | $m^2 s^{-1}$ | 20 |

### Bunsen coefficients

|              |                          |    |    |
|--------------|--------------------------|----|----|
| $A_{1,CO_2}$ | -60.2409                 | -- | 21 |
| $A_{2,CO_2}$ | 93.4517                  | -- | 21 |
| $A_{3,CO_2}$ | 23.3585                  | -- | 21 |
| $B_{1,CO_2}$ | $2.3517 \times 10^{-2}$  | -- | 21 |
| $B_{2,CO_2}$ | $-2.3656 \times 10^{-2}$ | -- | 21 |
| $B_{3,CO_2}$ | $4.7036 \times 10^{-3}$  | -- | 21 |
| $A_{1,O_2}$  | -58.3877                 | -- | 22 |
| $A_{2,O_2}$  | 85.8079                  | -- | 22 |
| $A_{3,O_2}$  | 23.8439                  | -- | 22 |
| $B_{1,O_2}$  | $3.4892 \times 10^{-2}$  | -- | 22 |
| $B_{2,O_2}$  | $1.5568 \times 10^{-2}$  | -- | 22 |
| $B_{3,O_2}$  | $-1.9387 \times 10^{-3}$ | -- | 22 |
| $A_{1,H_2}$  | -39.9611                 | -- | 23 |
| $A_{2,H_2}$  | 53.9381                  | -- | 23 |
| $A_{3,H_2}$  | 16.3135                  | -- | 23 |
| $B_{1,H_2}$  | $2.3517 \times 10^{-2}$  | -- | 23 |
| $B_{2,H_2}$  | $1.7566 \times 10^{-2}$  | -- | 23 |
| $B_{3,H_2}$  | $-2.3010 \times 10^{-3}$ | -- | 23 |

### pH controller

|        |     |           |    |
|--------|-----|-----------|----|
| $K_C$  | 0.1 | $hr^{-1}$ | -- |
| $\tau$ | 60  | s         | -- |

### Combustion energy

|                      |       |               |        |
|----------------------|-------|---------------|--------|
| $\Delta_r G_X^0$     | -479  | $kJ mol^{-1}$ | Note 4 |
| $\Delta_r G_E^0$     | -479  | $kJ mol^{-1}$ | Note 4 |
| $\Delta_r G_{H_2}^0$ | -260  | $kJ mol^{-1}$ | Note 4 |
| $\Delta_r G_{FFA}^0$ | -240  | $kJ mol^{-1}$ | Note 4 |
| $\Delta_r G_{LLA}^0$ | -1370 | $kJ mol^{-1}$ | Note 4 |
| $\Delta_r G_{AAA}^0$ | -870  | $kJ mol^{-1}$ | Note 4 |

### CO<sub>2</sub> electrolyzer

|               |      |              |    |
|---------------|------|--------------|----|
| $j$           | 140  | $mA cm^{-2}$ | 24 |
| $\eta_F$      | 94   | %            | 24 |
| $V_e$         | 3.5  | V            | 24 |
| $c_{FFA,eff}$ | 2.08 | M            | 24 |

### H<sub>2</sub> electrolyzer

|          |      |              |    |
|----------|------|--------------|----|
| $j$      | 1000 | $mA cm^{-2}$ | 25 |
| $\eta_F$ | 99   | %            | 25 |
| $V_e$    | 2.0  | V            | 25 |

### Electrodialysis – lactic acid

|               |        |               |        |
|---------------|--------|---------------|--------|
| $\alpha_{ED}$ | 0.5154 | $kWh kg^{-1}$ | Note 5 |
|---------------|--------|---------------|--------|

|                               |                      |                                   |        |
|-------------------------------|----------------------|-----------------------------------|--------|
| $b_{ED}$                      | $3.7 \times 10^{-2}$ | Wh L <sup>-1</sup>                | Note 5 |
| $\Gamma_{max}$                | 7.56                 | kg m <sup>2</sup> h <sup>-1</sup> | Note 5 |
| $\kappa_M$                    | 51.5                 | g L <sup>-1</sup>                 | Note 5 |
| Electrodialysis – formic acid |                      |                                   |        |
| $\eta_{ED,F}$                 | 3                    | %                                 | Note 5 |
| $\Gamma_{max}$                | 6.42                 | kg m <sup>2</sup> h <sup>-1</sup> | Note 5 |
| $\kappa_M$                    | 26.3                 | g L <sup>-1</sup>                 | Note 5 |

---

**Table S2. Power breakdown for subprocesses.**

| Process power (kWh/kg CDW)                | Value                 |                 |                   |                    |
|-------------------------------------------|-----------------------|-----------------|-------------------|--------------------|
|                                           | <i>Formatotrophic</i> | <i>Knallgas</i> | <i>Acetogenic</i> | <i>Theoretical</i> |
| Substrate generation                      | 47.26                 | 22.61           | 19.55             | 5.32               |
| Gas-liquid mass transfer and fluid mixing | 0.48                  | 0.43            | 1.38              | 0                  |
| Liquid heating                            | 0.26                  | 0.13            | 0.91              | 0                  |
| Direct air capture of CO <sub>2</sub>     | 4.22                  | 3.56            | 4.2               | 0.22               |
| Haber-Bosch ammonia production            | 1.68                  | 1.68            | 1.89              | 0.88               |
| Chlor-alkali process (pH control)         | 0.38                  | 0               | 4.01              | 0                  |

---

**Table S3. Parameter sensitivity**

| Parameter                                    | Baseline Value | Units                  | Parameter -30% | Parameter +30% | Formate GWP -30% | H2 GWP -30%   | Acetate GWP -30% | Hetero GWP -30% | Formate GWP +30% | H2 GWP +30%   | Acetate GWP +30% | Hetero GWP +30% |
|----------------------------------------------|----------------|------------------------|----------------|----------------|------------------|---------------|------------------|-----------------|------------------|---------------|------------------|-----------------|
| <b>Impact Model Parameters – Biomass</b>     |                |                        |                |                |                  |               |                  |                 |                  |               |                  |                 |
| BASELINE                                     | n/a            |                        | n/a            | n/a            | <b>1.1607</b>    | <b>0.6816</b> | <b>1.3509</b>    | <b>1.9427</b>   | <b>1.1607</b>    | <b>0.6816</b> | <b>1.3509</b>    | <b>1.9427</b>   |
| Glucose GWP                                  | 0.95           | kg co2/kg              | 0.665          | 1.235          | 1.1607           | 0.6816        | 1.3509           | 1.3727          | 1.1607           | 0.6816        | 1.3509           | 2.5127          |
| % GWP Corn Fertilizer                        | 0.25           |                        | 0.175          | 0.325          | 1.1607           | 0.6816        | 1.3509           | 2.0352          | 1.1607           | 0.6816        | 1.3509           | 1.8501          |
| Heterotroph Productivity                     | 19.8           | kg/L/yr                | 13.86          | 25.74          | 1.1607           | 0.6816        | 1.3509           | 1.9538          | 1.1607           | 0.6816        | 1.3509           | 1.9366          |
| Glucose Yield                                | 0.5            | kg biomass/kg glucose  | 0.35           | 0.65           | 1.1607           | 0.6816        | 1.3509           | 2.649           | 1.1607           | 0.6816        | 1.3509           | 1.5623          |
| Distance NH3 Shipped [km]                    | 500            | km                     | 350            | 650            | 1.1593           | 0.6801        | 1.3493           | 1.9412          | 1.1622           | 0.683         | 1.3525           | 1.9441          |
| Distance Nutrients Shipped [km]              | 500            | km                     | 350            | 650            | 1.1588           | 0.6777        | 1.3247           | 1.9385          | 1.1627           | 0.6855        | 1.377            | 1.9469          |
| Distance electrolyzer materials Shipped [km] | 500            | km                     | 350            | 650            | 1.1607           | 0.6816        | 1.3509           | 1.9427          | 1.1607           | 0.6816        | 1.3509           | 1.9427          |
| Distance Bioreactors shipped [km]            | 500            | km                     | 350            | 650            | 1.1607           | 0.6815        | 1.3507           | 1.9426          | 1.1608           | 0.6816        | 1.3511           | 1.9427          |
| Distance Glucose shipped [km]                | 500            | km                     | 350            | 650            | 1.1607           | 0.6816        | 1.3509           | 1.9257          | 1.1607           | 0.6816        | 1.3509           | 1.9596          |
| Wind GWP                                     | 9.102          | kg co2/MWh             | 6.3714         | 11.8326        | 1.0136           | 0.6034        | 1.266            | 1.9342          | 1.3078           | 0.7598        | 1.4358           | 1.9511          |
| DAC Electricity Demand                       | 2.02           | kWh/kg CO2             | 1.414          | 2.626          | 1.1492           | 0.6719        | 1.3395           | 1.9427          | 1.1722           | 0.6913        | 1.3623           | 1.9427          |
| Adsorbent GWP                                | 23.7           | g CO2-e/kg CO2 capture | 16.59          | 30.81          | 1.1458           | 0.6691        | 1.3362           | 1.9427          | 1.1756           | 0.6941        | 1.3656           | 1.9427          |
| DAC Plant GWP                                | 15             | g CO2-e/kg CO2 capture | 10.5           | 19.5           | 1.1513           | 0.6737        | 1.3416           | 1.9427          | 1.1701           | 0.6895        | 1.3602           | 1.9427          |
| GWP Ammonia (besides H2 electrolysis)        | 0.4105         | kg co2/ kg nh3         | 0.28735        | 0.53365        | 1.1396           | 0.6605        | 1.3273           | 1.9065          | 1.1818           | 0.7027        | 1.3745           | 1.9788          |
| Green Ammonia Electricity Demand             | 9.41           | kWh/kg NH3             | 6.587          | 12.233         | 1.1563           | 0.6772        | 1.346            | 1.9351          | 1.1651           | 0.686         | 1.3558           | 1.9502          |
| Phosphoric Acid GWP                          | 1.012          | kg CO2-e/kg            | 0.7084         | 1.3156         | 1.1293           | 0.6502        | 1.3158           | 1.9113          | 1.1921           | 0.713         | 1.386            | 1.974           |
| NaCl GWP                                     | 0.178          | kg CO2-e/kg            | 0.1246         | 0.2314         | 1.1575           | 0.6808        | 1.3481           | 1.9398          | 1.1639           | 0.6824        | 1.3537           | 1.9455          |
| MgSO4 GWP                                    | 0.239          | kg CO2-e/kg            | 0.1673         | 0.3107         | 1.1577           | 0.6786        | 1.3476           | 1.9397          | 1.1637           | 0.6846        | 1.3542           | 1.9456          |
| CaCl2 GWP                                    | 0.611          | kg CO2-e/kg            | 0.4277         | 0.7943         | 1.1596           | 0.6805        | 1.3496           | 1.9415          | 1.1618           | 0.6827        | 1.3521           | 1.9438          |
| FeCl3 GWP                                    | 0.511          | kg CO2-e/kg            | 0.3577         | 0.6643         | 1.1607           | 0.6815        | 1.3508           | 1.9426          | 1.1608           | 0.6816        | 1.351            | 1.9427          |
| NaOH GWP minus electrolysis                  | 0.116          | kg CO2-e/kg            | 0.0812         | 0.1508         | 1.16             | 0.6714        | 1.2991           | 1.9325          | 1.1614           | 0.6917        | 1.4027           | 1.9528          |
| HCl GWP minus electrolysis                   | 0.127          | kg CO2-e/kg            | 0.0889         | 0.1651         | 1.1607           | 0.6816        | 1.2987           | 1.9427          | 1.1607           | 0.6816        | 1.4031           | 1.9427          |
| NaOH chlor-alkali electricity demand         | 1.1            | kWh/kg                 | 0.77           | 1.43           | 1.1607           | 0.6807        | 1.3464           | 1.9418          | 1.1608           | 0.6825        | 1.3554           | 1.9435          |

|                                          |        |                  |         |         |        |        |        |        |        |        |        |        |
|------------------------------------------|--------|------------------|---------|---------|--------|--------|--------|--------|--------|--------|--------|--------|
| HCl Chlor-alkali electricity demand      | 1.21   | kWh/kg           | 0.847   | 1.573   | 1.1607 | 0.6816 | 1.3464 | 1.9427 | 1.1607 | 0.6816 | 1.3554 | 1.9427 |
| Iridium GWP                              | 8860   | kg Co2-e/kg      | 6202    | 11518   | 1.1392 | 0.6801 | 1.3496 | 1.9427 | 1.1823 | 0.6831 | 1.3522 | 1.9427 |
| Carbon Fibre GWP                         | 30.98  | kg Co2-e/kg      | 21.686  | 40.274  | 1.1598 | 0.6815 | 1.3508 | 1.9427 | 1.1617 | 0.6817 | 1.351  | 1.9427 |
| Tin GWP                                  | 5.77   | kg Co2-e/kg      | 4.039   | 7.501   | 1.1607 | 0.6816 | 1.3509 | 1.9427 | 1.1607 | 0.6816 | 1.3509 | 1.9427 |
| Nafion GWP                               | 831    | kg Co2-e/kg      | 581.7   | 1080.3  | 1.1041 | 0.6804 | 1.3499 | 1.9427 | 1.2173 | 0.6828 | 1.3519 | 1.9427 |
| Polystyrene Sulfonate Cationic Resin GWP | 1.76   | kg Co2-e/kg      | 1.232   | 2.288   | 1.1603 | 0.6816 | 1.3509 | 1.9427 | 1.1611 | 0.6816 | 1.3509 | 1.9427 |
| Reactor Volume                           | 30000  | L                | 21000   | 39000   | 1.1667 | 0.6869 | 1.368  | 1.944  | 1.1568 | 0.678  | 1.3396 | 1.9417 |
| Reactor Weight:Vol                       | 0.6235 | kg/L             | 0.43645 | 0.81055 | 1.1466 | 0.6689 | 1.3103 | 1.9393 | 1.1749 | 0.6943 | 1.3915 | 1.946  |
| Reactor Lifetime                         | 8      | yr               | 5.6     | 10.4    | 1.1809 | 0.6998 | 1.4089 | 1.9474 | 1.1498 | 0.6718 | 1.3197 | 1.9401 |
| Steel GWP                                | 6.89   | kg CO2-e/kg      | 4.823   | 8.957   | 1.1466 | 0.6689 | 1.3105 | 1.9394 | 1.1748 | 0.6943 | 1.3913 | 1.946  |
| Reactor Area Density                     | 50     | L/m <sup>2</sup> | 35      | 65      | 1.1883 | 0.7064 | 1.43   | 1.9491 | 1.1459 | 0.6682 | 1.3083 | 1.9392 |
| Plant Lifetime                           | 40     | year             | 28      | 52      | 1.1883 | 0.7064 | 1.43   | 1.9491 | 1.1459 | 0.6682 | 1.3083 | 1.9392 |
| Bulding GWP/m^2                          | 595.9  | kg CO2-e/kg      | 417.13  | 774.67  | 1.1414 | 0.6642 | 1.2955 | 1.9381 | 1.18   | 0.6989 | 1.4063 | 1.9472 |
| Nitrogen Ratio                           | 0.134  | g N/ g biomass   | 0.0938  | 0.1742  | 1.1474 | 0.6375 | 1.3432 | 1.8986 | 1.2048 | 0.7256 | 1.3586 | 1.9867 |
| Phosphorous Ratio                        | 0.031  | g P/g biomass    | 0.0217  | 0.0403  | 1.132  | 0.6529 | 1.3101 | 1.914  | 1.1907 | 0.7103 | 1.3916 | 1.9713 |
| Sulfur Ratio                             | 0.0105 | g S/g biomass    | 0.00735 | 0.01365 | 1.1574 | 0.6783 | 1.3472 | 1.9393 | 1.164  | 0.6849 | 1.3546 | 1.946  |
| Calcium Ratio                            | 0.0021 | g Ca/g biomass   | 0.00147 | 0.00273 | 1.1595 | 0.6804 | 1.3496 | 1.9415 | 1.1619 | 0.6828 | 1.3522 | 1.9438 |
| Iron Ratio                               | 0.0001 | g Fe/g biomass   | 0.00007 | 0.00013 | 1.1607 | 0.6815 | 1.3508 | 1.9426 | 1.1608 | 0.6816 | 1.351  | 1.9427 |
| Nitrient Utilization Ratio               | 0.95   |                  | 0.665   | 1 *     | 1.2764 | 0.7933 | 1.4319 | 2.0577 | 1.1472 | 0.6686 | 1.3414 | 1.9292 |
| <b>Bioreactor Parameters – Biomass</b>   |        |                  |         |         |        |        |        |        |        |        |        |        |
| BASELINE                                 | n/a    |                  | n/a     | n/a     | 1.1607 | 0.6816 | 1.3509 | 1.9427 | 1.1607 | 0.6816 | 1.3509 | 1.9427 |
| mu_max,opt                               | 0.18   | hr <sup>-1</sup> | 0.126   | 0.234   | 1.1605 | 0.6816 | 1.3509 | 1.9427 | 1.1606 | 0.6816 | 1.3509 | 1.9427 |
| Y' X,F max                               | 0.169  | mol/mol          | 0.1183  | 0.2197  | 1.5565 | 0.6816 | 1.3509 | 1.9427 | 0.9659 | 0.6816 | 1.3509 | 1.9427 |
| theta_F                                  | 75.11  | mM               | 52.577  | 97.643  | 1.1608 | 0.6816 | 1.3509 | 1.9427 | 1.1607 | 0.6816 | 1.3509 | 1.9427 |
| Ks,F                                     | 10     | uM               | 7       | 13      | 1.1607 | 0.6816 | 1.3509 | 1.9427 | 1.1608 | 0.6816 | 1.3509 | 1.9427 |
| KS,O2                                    | 2.5    | uM               | 1.75    | 3.25    | 1.1607 | 0.6816 | 1.3509 | 1.9427 | 1.1608 | 0.6816 | 1.3509 | 1.9427 |
| pHmin                                    | 4      |                  | 2.8     | 5.2     | 1.1607 | 0.6816 | 1.3509 | 1.9427 | 1.1607 | 0.6816 | 1.3509 | 1.9427 |
| pHmax**                                  | 9      |                  | 8       | 11.7    | 1.1607 | 0.6816 | 1.3509 | 1.9427 | 1.1607 | 0.6816 | 1.3509 | 1.9427 |
| cNa_tox min                              | 0.2    | M                | 0.14    | 0.26    | 1.1607 | 0.6816 | 1.3509 | 1.9427 | 1.1607 | 0.6816 | 1.3509 | 1.9427 |
| can_tox max                              | 1.05   | M                | 0.735   | 1.365   | 1.1607 | 0.6816 | 1.3509 | 1.9427 | 1.1607 | 0.6816 | 1.3509 | 1.9427 |

|             |       |                  |        |        |        |        |        |        |        |        |        |        |
|-------------|-------|------------------|--------|--------|--------|--------|--------|--------|--------|--------|--------|--------|
| mu_max,opt  | 0.18  | hr <sup>-1</sup> | 0.126  | 0.234  | 1.1607 | 0.6813 | 1.3509 | 1.9427 | 1.1607 | 0.6819 | 1.3509 | 1.9427 |
| Y' X,H max  | 0.19  | mol/mol          | 0.133  | 0.247  | 1.1607 | 0.8412 | 1.3509 | 1.9427 | 1.1607 | 0.6075 | 1.3509 | 1.9427 |
| Ks,H2       | 20.4  | uM               | 14.28  | 26.52  | 1.1607 | 0.6815 | 1.3509 | 1.9427 | 1.1607 | 0.6817 | 1.3509 | 1.9427 |
| Ks,O2       | 2.5   | uM               | 1.75   | 3.25   | 1.1607 | 0.6816 | 1.3509 | 1.9427 | 1.1607 | 0.6816 | 1.3509 | 1.9427 |
| Ks,CO2      | 9.38  | uM               | 6.566  | 12.194 | 1.1607 | 0.6816 | 1.3509 | 1.9427 | 1.1607 | 0.6816 | 1.3509 | 1.9427 |
| pHmin       | 4     |                  | 2.8    | 5.2    | 1.1607 | 0.6816 | 1.3509 | 1.9427 | 1.1607 | 0.6816 | 1.3509 | 1.9427 |
| pHmax**     | 9     |                  | 8      | 11.7   | 1.1607 | 0.6816 | 1.3509 | 1.9427 | 1.1607 | 0.6816 | 1.3509 | 1.9427 |
| cNa_tox min | 0.2   | M                | 0.14   | 0.26   | 1.1607 | 0.6816 | 1.3509 | 1.9427 | 1.1607 | 0.6816 | 1.3509 | 1.9427 |
| cNa_tox_max | 1.05  | M                | 0.735  | 1.365  | 1.1607 | 0.6816 | 1.3509 | 1.9427 | 1.1607 | 0.6816 | 1.3509 | 1.9427 |
| mu_max_opt  | 0.044 | hr <sup>-1</sup> | 0.0308 | 0.0572 | 1.1607 | 0.6816 | 1.4586 | 1.9427 | 1.1607 | 0.6816 | 1.2938 | 1.9427 |
| Ks,H2       | 20    | uM               | 14     | 26     | 1.1607 | 0.6816 | 1.3496 | 1.9427 | 1.1607 | 0.6816 | 1.3547 | 1.9427 |
| Ks,CO2      | 20    | uM               | 14     | 26     | 1.1607 | 0.6816 | 1.3509 | 1.9427 | 1.1607 | 0.6816 | 1.3509 | 1.9427 |
| nATP        | 0.47  |                  | 0.329  | 0.611  | 1.1607 | 0.6816 | 1.338  | 1.9427 | 1.1607 | 0.6816 | 1.3642 | 1.9427 |
| pHmin       | 4     |                  | 2.8    | 5.2    | 1.1607 | 0.6816 | 1.3509 | 1.9427 | 1.1607 | 0.6816 | 1.3509 | 1.9427 |
| pHmax**     | 9     |                  | 8      | 11.7   | 1.1607 | 0.6816 | 1.3509 | 1.9427 | 1.1607 | 0.6816 | 1.3509 | 1.9427 |
| cNa_tox min | 0.2   | M                | 0.14   | 0.26   | 1.1607 | 0.6816 | 1.3685 | 1.9427 | 1.1607 | 0.6816 | 1.3337 | 1.9427 |
| cNa_tox_max | 1.05  | M                | 0.735  | 1.365  | 1.1607 | 0.6816 | 1.4403 | 1.9427 | 1.1607 | 0.6816 | 1.3037 | 1.9427 |
| mu_max_opt  | 0.3   | hr <sup>-1</sup> | 0.21   | 0.39   | 1.1607 | 0.6816 | 1.3526 | 1.9427 | 1.1607 | 0.6816 | 1.3527 | 1.9427 |
| Y' X,Ac     | 0.936 | mol/mol          | 0.6552 | 1.2168 | 1.1607 | 0.6816 | 1.8509 | 1.9427 | 1.1607 | 0.6816 | 1.0851 | 1.9427 |
| Ks,O2       | 2.5   | uM               | 1.75   | 3.25   | 1.1607 | 0.6816 | 1.3506 | 1.9427 | 1.1607 | 0.6816 | 1.3528 | 1.9427 |
| Ks,Ac       | 10    | uM               | 7      | 13     | 1.1607 | 0.6816 | 1.3508 | 1.9427 | 1.1607 | 0.6816 | 1.351  | 1.9427 |
| Ki,Ac       | 0.83  | uM               | 0.581  | 1.079  | 1.1607 | 0.6816 | 1.3509 | 1.9427 | 1.1607 | 0.6816 | 1.3509 | 1.9427 |
| pHmin       | 4     |                  | 2.8    | 5.2    | 1.1607 | 0.6816 | 1.3509 | 1.9427 | 1.1607 | 0.6816 | 1.3509 | 1.9427 |
| pHmax**     | 9.5   |                  | 8      | 12.35  | 1.1607 | 0.6816 | 1.3509 | 1.9427 | 1.1607 | 0.6816 | 1.3509 | 1.9427 |
| cNa_tox min | 0.2   | M                | 0.14   | 0.26   | 1.1607 | 0.6816 | 1.3514 | 1.9427 | 1.1607 | 0.6816 | 1.3507 | 1.9427 |
| cNa_tox_max | 1.05  | M                | 0.735  | 1.365  | 1.1607 | 0.6816 | 1.3544 | 1.9427 | 1.1607 | 0.6816 | 1.3506 | 1.9427 |

| Parameter                                        | Baseline Value | Units            | Parameter -30% | Parameter +30% | Formate GWP -30% | H2 GWP -30%   | Acetate GWP -30% | Hetero GWP -30% | Formate GWP +30% | H2 GWP +30%   | Acetate GWP +30% | Hetero GWP +30% |
|--------------------------------------------------|----------------|------------------|----------------|----------------|------------------|---------------|------------------|-----------------|------------------|---------------|------------------|-----------------|
| <b>Bioreactor Model Parameters – Lactic Acid</b> |                |                  |                |                |                  |               |                  |                 |                  |               |                  |                 |
| BASELINE                                         | n/a            | n/a              | n/a            | n/a            | <b>0.7775</b>    | <b>0.4784</b> | <b>0.8952</b>    | <b>1.0915</b>   | <b>0.7775</b>    | <b>0.4784</b> | <b>0.8952</b>    | <b>1.0915</b>   |
| Y' X,F max                                       | 0.169          | mol/mol          | 0.1183         | 0.2197         | 0.8217           | 0.4784        | 0.8952           | 1.0915          | 0.7670           | 0.4784        | 0.8952           | 1.0915          |
| Y' L,F max                                       | 0.11           | mol/mol          | 0.077          | 0.143          | 0.9421           | 0.4784        | 0.8952           | 1.0915          | 0.7565           | 0.4784        | 0.8952           | 1.0915          |
| mu_max_opt                                       | 0.018          | hr <sup>-1</sup> | 0.0126         | 0.0234         | 0.7854           | 0.4784        | 0.8952           | 1.0915          | 0.7948           | 0.4784        | 0.8952           | 1.0915          |
| c_Na_min                                         | 0.2            | M                | 0.14           | 0.26           | 0.7953           | 0.4784        | 0.8952           | 1.0915          | 0.7694           | 0.4784        | 0.8952           | 1.0915          |
| c_Na_max                                         | 1.05           | M                | 0.735          | 1.365          | 1.0228           | 0.4784        | 0.8952           | 1.0915          | 0.7566           | 0.4784        | 0.8952           | 1.0915          |
| Y' X,H max                                       | 0.19           | mol/mol          | 0.133          | 0.247          | 0.7775           | 0.4874        | 0.8952           | 1.0915          | 0.7775           | 0.4736        | 0.8952           | 1.0915          |
| Y' L,H max                                       | 0.11           | mol/mol          | 0.077          | 0.143          | 0.7775           | 0.5243        | 0.8952           | 1.0915          | 0.7775           | 0.4541        | 0.8952           | 1.0915          |
| mu_max_opt                                       | 0.018          | hr <sup>-1</sup> | 0.0126         | 0.0234         | 0.7775           | 0.5464        | 0.8952           | 1.0915          | 0.7775           | 0.4421        | 0.8952           | 1.0915          |
| c_Na_min                                         | 0.2            | M                | 0.14           | 0.26           | 0.7775           | 0.4896        | 0.8952           | 1.0915          | 0.7775           | 0.4672        | 0.8952           | 1.0915          |
| c_Na_max                                         | 1.05           | M                | 0.735          | 1.365          | 0.7775           | 0.5395        | 0.8952           | 1.0915          | 0.7775           | 0.4431        | 0.8952           | 1.0915          |
| mu_max_opt                                       | 0.044          | hr <sup>-1</sup> | 0.0308         | 0.0572         | 0.7775           | 0.4784        | 0.9558           | 1.0915          | 0.7775           | 0.4784        | 0.8644           | 1.0915          |
| nATP                                             | 0.47           |                  | 0.329          | 0.611          | 0.7775           | 0.4784        | 0.8873           | 1.0915          | 0.7775           | 0.4784        | 0.9033           | 1.0915          |
| c_Na_min                                         | 0.2            | M                | 0.14           | 0.26           | 0.7775           | 0.4784        | 0.9059           | 1.0915          | 0.7775           | 0.4784        | 0.8846           | 1.0915          |
| c_Na_max                                         | 1.05           | M                | 0.735          | 1.365          | 0.7775           | 0.4784        | 0.9863           | 1.0915          | 0.7775           | 0.4784        | 0.8874           | 1.0915          |
| Y' X,Ac                                          | 0.936          | mol/mol          | 0.6552         | 1.2168         | 0.7775           | 0.4784        | 0.9523           | 1.0915          | 0.7775           | 0.4784        | 0.8680           | 1.0915          |
| Y' L,Ac                                          | 0.5            | mol/mol          | 0.35           | 0.65           | 0.7775           | 0.4784        | 1.2050           | 1.0915          | 0.7775           | 0.4784        | 0.7321           | 1.0915          |
| mu_max_opt                                       | 0.3            | hr <sup>-1</sup> | 0.21           | 0.39           | 0.7775           | 0.4784        | 0.9891           | 1.0915          | 0.7775           | 0.4784        | 0.8443           | 1.0915          |
| c_Na_min                                         | 0.2            | M                | 0.14           | 0.26           | 0.7775           | 0.4784        | 0.9134           | 1.0915          | 0.7775           | 0.4784        | 0.8770           | 1.0915          |
| c_Na_max                                         | 1.05           | M                | 0.735          | 1.365          | 0.7775           | 0.4784        | 1.0732           | 1.0915          | 0.7775           | 0.4784        | 0.8606           | 1.0915          |



## Supplementary notes

### Note 1: Optimizing full-system productivity in the acetate-mediated system

For both biomass and enzyme production, the acetotrophic portion of the acetate-mediated system is limited ultimately by O<sub>2</sub> gas-liquid mass transfer, as described in the main text. The feed concentration of acetate/ic acid, therefore, plays no role in determining the productivity of this reactor because the dilution rate can be adjusted in the opposite direction of a change in the feed acetate/ic acid concentration to maintain a constant productivity. Hence, the full-system productivity is maximized by maximizing the productivity of the upstream acetogenesis reactor. Acetate/ic acid productivity in the acetogenesis reactor is maximized by an intermediate normalized dilution rate of ~0.55 (Fig. S1a).

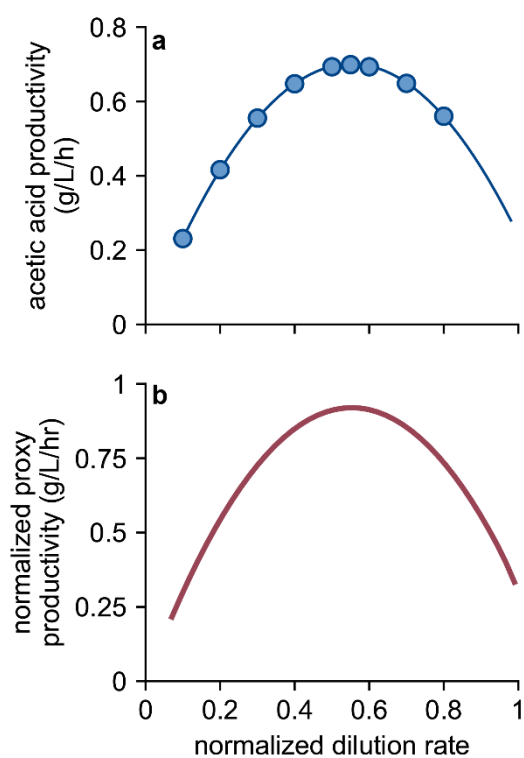

**Figure S1. Optimal productivity in the acetate-mediated system.** Maximum (a) acetate/ic acid productivity in the acetogenic reactor and (b) proxy full-system lactic acid productivity as a function of the normalized dilution rate in the acetogenic reactor. In both cases, the productivity is maximized at a normalized dilution rate of 0.55.

This trend is analogous to that of lactic acid production in the H<sub>2</sub>-mediated case as described in the main text, where the product (lactic acid or acetic acid) concentration is negatively proportional to the dilution rate (in this case,  $c_{AAA} \propto -D_{liq,A}$ ) such that the reactor productivity is negatively proportional to the square of the dilution rate (here,  $\dot{m}_{AAA,A} = D_{liq,A}c_{AAA}$ , so  $\dot{m}_{AAA,A} \propto -(D_{liq,A})^2$ ).

The picture is more complicated for lactic acid production in this system because the acetate/ic acid feed concentration does contribute to the maximum lactic acid productivity in the acetotrophic reactor; specifically,  $\dot{m}_{LLA,Ac} \propto Y'_{L/Ac} D_{liq,Ac} c_{AAA,f}$ , where  $c_{AAA,f}$  represents the total acetate/ic acid concentration fed to the acetotrophic reactor. The maximum dilution rate is negatively proportional to the fed acetic acid concentration, that is,  $D_{liq,Ac} \propto -c_{AAA,f}$  (see analogous description below in Note 2 for an explanation of this point), such that the productivity in the acetotrophic reactor is negatively proportional to the square of the acetate/ic acid feed concentration:  $\dot{m}_{LLA,Ac} \propto -(c_{AAA,f})^2$ . From eq. 73 in the main text, the overall productivity of lactic acid is proportional to the productivity in the acetotrophic reactor and the ratio of the dilution rates in each reactor, equivalently  $\dot{m}_{LLA,AA} \propto \dot{m}_{LLA,Ac} \left( \frac{D_{liq,A}}{D_{liq,Ac}} \right)$ . The feed acetate/ic acid concentration to the acetotrophic reactor ( $c_{AAA,f}$ ) is equivalent to the exit acetate/ic acid concentration in the acetogenic reactor ( $c_{AAA}$ , above). The dilution rate in the acetotrophic reactor is negatively proportional to the feed concentration, which is in turn negatively proportional to the dilution rate in the acetogenic reactor. Hence, this dependence cancels out and  $\dot{m}_{LLA,AA} \propto \dot{m}_{LLA,Ac}$ , which indicates that  $\dot{m}_{LLA,AA} \propto -(c_{AAA,f})^2$ , or equivalently,  $\dot{m}_{LLA,A} \propto -(D_{liq,A})^2$ . We use the acetate feed rate ( $D_{liq,Ac} c_{AAA}$ ) as a proxy for the overall productivity (since they are proportional to each other) and plot the relationship between this proxy and the dilution rate in the acetogenic reactor (Fig. S1b). Interestingly, the productivity proxy is maximized at the same normalized dilution rate ( $\sim 0.55$ ) that maximizes acetate/ic acid productivity. Hence, in all base-cases in our model,  $\delta_A = 0.55$  and  $c_{AAA} \approx 0.48$  M.

*Note 2: Optimizing lactic acid productivity in the formate-mediated system*

The productivity of lactic acid (and any generic product) is given by  $D_{liq} c_{LLA}$ . The titer,  $c_{LLA}$ , is proportional to the product of the lactic acid yield on formate ( $Y'_{L/F}$ ) and the feed concentration of formate ( $c_{FFA,f}$ ), that is,  $c_{LLA} \propto Y'_{L/F} c_{FFA,f}$ . The dilution rate,  $D_{liq}$ , is typically thought of as independently controllable. However, the dilution rate is bounded by the maximum specific growth rate,  $\mu_{max}$ . The maximum specific growth rate is a function of the sodium concentration, specifically,  $\mu_{max} \propto -c_{Na}$  (eq. 47 in the main text). The sodium concentration, in turn, is a function of the lactic acid titer (specifically,  $c_{Na} \propto c_{LLA}$ ) because sodium hydroxide is added to neutralize the proton liberated by lactic acid production. Hence, because  $c_{LLA}$  is proportional to  $c_{FFA,f}$ , the maximum specific growth rate is negatively proportional to the feed concentration of formate/ic acid (that is,  $\mu_{max} \propto -c_{FFA,f}$ ). This also means that the maximum dilution rate is negatively proportional to the feed concentration because the dilution rate is bounded by the specific growth rate ( $D_{liq} \propto -c_{FFA,f}$ ). Together, this means the productivity of lactic acid in the formate mediated system ( $\dot{m}_{LLA,F}$ ) is negatively proportional to the squared feed concentration of formate/ic acid, that is,  $\dot{m}_{LLA,F} \propto -(c_{FFA,f})^2$ . Hence, we should expect to see a feed formate/ic acid concentration that maximizes the lactic acid productivity. Fig. S2 shows the maximum lactic acid productivity as a function of the feed concentration of formic acid and demonstrates a maximum productivity at  $\sim 5.1$  M formate/ic acid. We therefore selected a 5.1 M feed stream for formatotrophic production of lactic acid and considered the life cycle impact of an electrodialysis process to concentrate the effluent from the CO<sub>2</sub> electrolysis reactor.

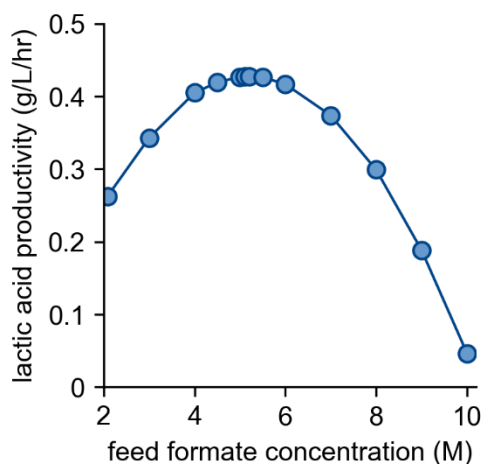

**Figure S2. Optimal formate feed concentration for lactic acid productivity.** Maximum lactic acid productivity as a function of the formate feed concentration. Maximum value of  $\sim 0.42$  g/L/h is achieved at a feed concentration of  $\sim 5.1$  M.

*Note 3: Intrinsically safer operation of the H<sub>2</sub>-mediated system*

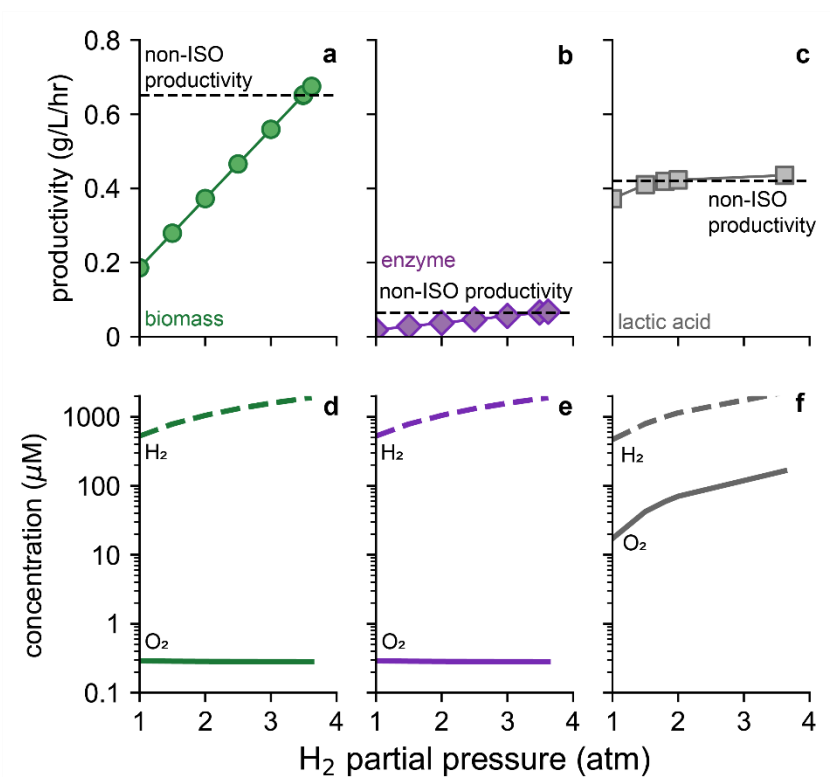

**Figure S3. Intrinsically-safer operation of the H<sub>2</sub>-mediated system.** Productivity (**a**, **b**, **c**) and liquid-phase concentration of H<sub>2</sub> and O<sub>2</sub> (**d**, **e**, **f**) for the H<sub>2</sub>-mediated EMP system under intrinsically-safer operation (ISO,  $p_{H_2}:p_{O_2} = 10:1$ ) producing biomass (**a**, **d**), enzyme (**b**, **e**), and lactic acid (**c**, **f**). Horizontal black dashed lines in (**a**, **b**, **c**) correspond to the non-ISO ( $p_{H_2}:p_{O_2} = 1:0.21$ ) base-case productivity for each of the three products. Low ( $<10$   $\mu$ M) O<sub>2</sub> concentration (solid lines in **d**, **e**, **f**) indicate O<sub>2</sub> gas-liquid mass transfer limitation on the productivity.

Note 4: Polylactic acid production life cycle impacts

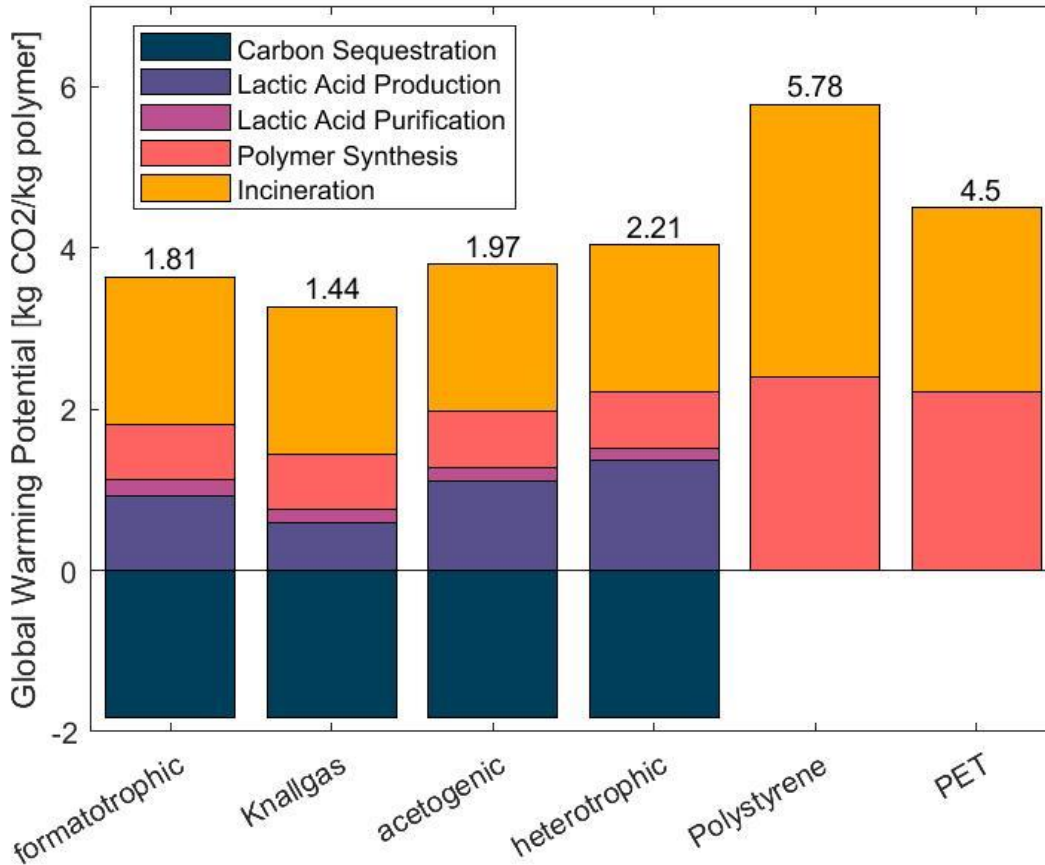

**Figure S4: Life Cycle Global Warming Potential of EMP-based and traditional plastics.** Life cycle (cradle-to-grave) global warming potential of polymer production of polylactic acid (PLA) in the three EMP systems and traditional bioprocesses compared to those of fossil-fuel based plastics polyethylene terephthalate (PET) and polystyrene (PS). EMP production assumes a 90% carbon efficiency (as defined in main text) and grid composed solely of wind power.

We analyzed the cradle-to-grave life cycle impact of polylactic acid (PLA) production. We split the PLA production process into five categories: carbon sequestration, lactic acid production, lactic acid purification, polymer synthesis, and end of life. The global warming potentials for the lactic acid production are identical to the results in Fig. 5c in the main text. Purification of lactic acid relies on acidifying the lactate anion produced in the bioreactor and therefore requires a stoichiometric proportion of sulfuric acid, the carbon footprint of which is obtained from the PEF dataset. We obtained data for the carbon footprint of polylactic acid polymer production from Morão and de Bie.<sup>26</sup> We further compared the global warming footprints to those of two major fossil-fuel based polymers: polyethylene terephthalate (PET) and polystyrene (PS). Carbon footprints for the production of these two polymers were obtained from the PEF dataset. We assume all plastics are incinerated at the end of their life and assume the carbon footprint is equal to the stoichiometric amount of carbon dioxide that would be produced by complete combustion of the polymer.

The global warming potentials of the cradle-to-grave PLA production of the three EMP systems and the traditional bioprocess reflect the same trends as for lactic acid production because the lactic acid purification and polymer synthesis steps are identical for each system. Therefore, the Knallgas bacteria-based system outcompetes the other bioprocesses in PLA production as it does in lactic acid production. All lactic acid production systems outperform the two fossil-based polymers, PET and PS, in terms of life cycle global warming potential, in the scenario shown. The acetogenic system and heterotrophic system both have comparable carbon footprints to the fossil-based plastics if the plastics are not incinerated, which is a plausible scenario given that burial is a common practice for plastic disposal. However, a true like-to-like comparison will involve incinerating these plastics to leave no waste, as PLA will ultimately biodegrade in the environment. In the scenario, all methods of PLA production have smaller carbon footprints when compared to PET and PS.

These results are for a carbon conversion efficiency of 90%, similar to current glucose-based PLA fermentation. As noted in the main text, an efficiency this high will be difficult in EMP processes. Lower carbon efficiencies in the lactic acid production step will therefore increase the total carbon footprint of PLA production. As shown in Fig. 6b in the main text, this change in GWP is also dependent on the electricity source/grid composition. As with lactic acid production, for H<sub>2</sub>-mediated electromicrobial production of PLA to outcompete heterotroph-based processes, the process must rely on renewable electricity and must achieve a carbon efficiency of around 50%.

*Note 5: calculating combustion energies*

To calculate combustion energies, we adopted the strategy of Claassens *et al.*<sup>27</sup> Briefly, we used eQuilibrator<sup>28</sup> to calculate the  $\Delta_r G'^0$  of the combustion reaction at a pH of 7.0 and ionic strength of 0.1 M. The biomass combustion energy was adopted from previous calculations.<sup>29,30</sup>

*Note 6: calculating parameters for electrodialysis-based separations*

Data from Hábová *et al.*<sup>31</sup> were used to determine parameters for membrane electrodialysis. Energy consumption as a function of lactic acid feed concentration was determined according to a linear model, eq. 87 in the main text. The linear model fit well to reported data ( $R^2 = 0.73$ ), as shown in Fig. S4a. Lactic acid flux parameters were determined similarly and fit well to the proposed model ( $R^2 = 0.85$ ), as shown in Fig. S4b.

Because relatively little data exist on formic acid concentration in membrane electrodialysis, we used the same dataset to estimate an average energy efficiency ( $\eta_{ED,F}$ ) of 3%. We also used the same fitting parameters but modified the values to account for the different molar masses and diffusivities of lactic acid and formic acid.

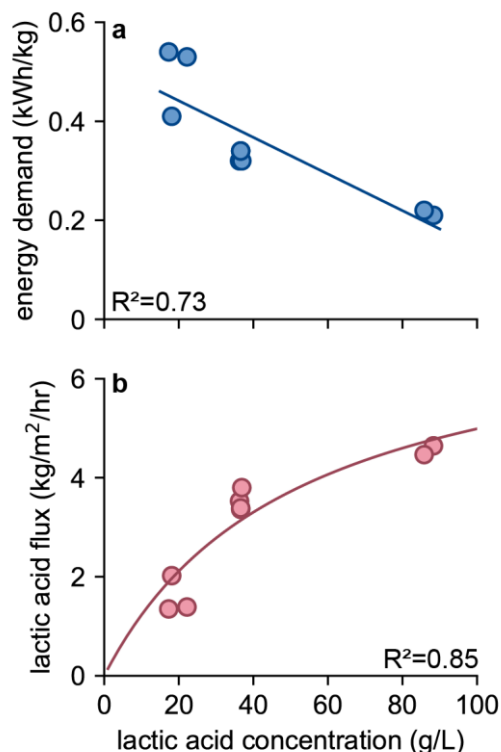

**Figure S5. Fitting parameters for membrane electrodialysis.** (a) energy demand and (b) through-membrane lactic acid flux for membrane electrodialysis as a function of the fed lactic acid concentration. Circles represent data from Hábová *et al.* and solid lines are fitted equations.

*Note 7: reactor model parameter sensitivity calculations*

When some parameters (*e.g.*, the maximum specific growth rate,  $\mu_{\max, \text{opt}}$ ) are adjusted, operating conditions such as the liquid dilution rate ( $D_{\text{liq}}$ ) have different optima. In these cases, we identified the new optimal operating conditions and report system outputs based on these.

*Note 8: Theoretical Energy and Material Demands of EMP Process*

Table 2 in the main text displays the predicted material and energy demands for EMP processes through the three studied schemes. Also included are theoretical minimum values for each of the material and energy demands listed.

Grosz and Stephanopolous give the Gibbs Free Energy of Formation for *E. coli* as -46.0 kJ/mol C<sub>29</sub>:

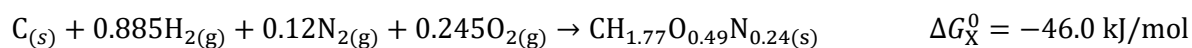

To determine Gibbs free energies for reactions relevant to the EMP systems, however, manipulations can be made. As CO<sub>2</sub>, rather than solid carbon, and ammonia, rather than nitrogen

gas, are fed into the EMP system, the chemical equation above may be linearly combined with the equation for formation of CO<sub>2</sub>:

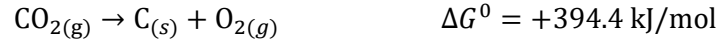

as well as the equation for the formation of ammonia

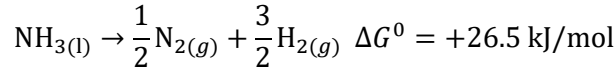

The free energy of biomass from CO<sub>2</sub>, H<sub>2</sub>, and NH<sub>3</sub>, as it occurs in an electromicrobial system, is therefore

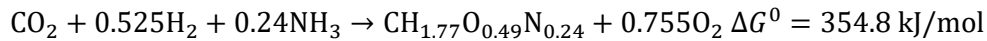

When considering water, rather than hydrogen gas, as a reactant for the EMP system,

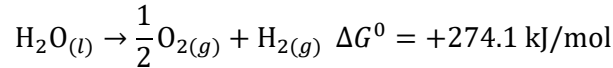

the equation becomes

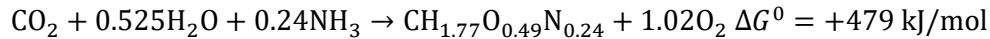

Therefore, the theoretical energy input required to produce biomass is 479 kJ/mol C of biomass. Using a biomass molar mass of 25 g/mol C, and converting the energy to kWh, this energy requirement on a mass basis is 5.32 kWh/kg biomass.

### Carbon Demand

The carbon demand to produce biomass is simply determined by stoichiometry. As one mole of CO<sub>2</sub> is fixed per carbon mole of biomass (MW=25.0 g/mol), 1.76 kg CO<sub>2</sub> are required per mole of biomass.

Assuming CO<sub>2</sub> is fed to the EMP reactor at 1 atm, and is fixed from atmospheric CO<sub>2</sub>, the minimum energy required to produce this CO<sub>2</sub> is equal to the Gibbs Free Energy required to concentrate from 400 pm to pure CO<sub>2</sub>. Assuming CO<sub>2</sub> behaves as an ideal gas, this free energy at standard temperature is:

$$\Delta G^0 = -RT \ln \left( \frac{1 \text{ atm}}{0.0004 \text{ atm}} \right) = 19.4 \frac{\text{kJ}}{\text{mol}} = 0.12 \frac{\text{kWh}}{\text{kg CO}_2} = 0.22 \frac{\text{kWh}}{\text{kg Biomass}}$$

### Nitrogen Demand

The theoretical ammonia demand is obtained by stoichiometry, assuming one mole of ammonia is required per mole of nitrogen fixed in biomass, using the biomass equation CH<sub>1.77</sub>O<sub>0.49</sub>N<sub>0.24</sub>. Therefore, 0.24 mol of ammonia per carbon mole of biomass, or 0.163 kg NH<sub>3</sub> per kg biomass, is required.

The minimum energy required to produce this ammonia using nitrogen gas (from air) and water (as is the case in green ammonia production) can be determined from the Gibbs Free Energy of the following reaction:

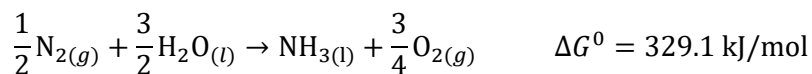

Using the ammonia to biomass ratio determined above, the energy required in nitrogen fixation for 1 kg of biomass is 0.88 kWh.

#### Total NaOH and HCl

As the net equation for the formation of biomass (see above) involves no net consumption/generation of protons, the theoretical required mass of NaOH and HCl is 0. The theoretical energy required to produce these pH control agents is therefore also 0.

#### Total Process Electricity

The theoretical total process electricity is equal to the sum of the theoretical energy requirements of the constitutive subprocesses (electrolysis/bioreactor electricity, NH<sub>3</sub> generation electricity, CO<sub>2</sub> generation electricity, and NaOH/HCl generation electricity).

#### **References**

- 1 S. Grunwald, A. Mottet, E. Grousseau, J. K. Plassmeier, M. K. Popović, J. L. Uribe Larrea, N. Gorret, S. E. Guillouet and A. Sinskey, *Microb. Biotechnol.*, 2015, **8**, 155–163.
- 2 A. J. Abel and D. S. Clark, *ChemSusChem*, 2021, **14**, 344–355.
- 3 D. A. Stolpera, N. P. Revsbech and D. E. Canfield, *Proc. Natl. Acad. Sci. U. S. A.*, 2010, **107**, 18755–18760.
- 4 A. Y. Dursun and O. Tepe, *J. Hazard. Mater.*, 2005, **126**, 105–111.
- 5 X. Wu, R. Altman, M. A. Eiteman and E. Altman, *Appl. Environ. Microbiol.*, 2014, **80**, 2880–2888.
- 6 A. Ishizaki and K. Tanaka, *J. Ferment. Bioeng.*, 1990, **69**, 170–174.
- 7 T. Takeshita and A. Ishizaki, *J. Ferment. Bioeng.*, 1996, **81**, 83–86.
- 8 X. C. Shi, P. L. Tremblay, L. Wan and T. Zhang, *Sci. Total Environ.*, 2021, **754**, 142440.
- 9 J. Chen, J. A. Gomez, K. Höffner, P. I. Barton and M. A. Henson, *Biotechnol. Biofuels*, 2015, **8**, 1–12.
- 10 A. G. Fast and E. T. Papoutsakis, *Curr. Opin. Chem. Eng.*, 2012, **1**, 380–395.
- 11 K. B. Andersen and K. Von Meyenburg, *J. Bacteriol.*, 1980, **144**, 114–123.
- 12 Y. Xiao, X. Feng, A. M. Varman, L. He, H. Yu and Y. J. Tang, *Ind. Eng. Chem. Res.*, 2012, **51**, 15855–15863.
- 13 E. F. Gale and H. M. R. Epps, *Biochem. J.*, 1942, **36**, 600–618.
- 14 D. Blankenhorn, J. Phillips and J. L. Slonczewski, *J. Bacteriol.*, 1999, **181**, 2209–2216.
- 15 K. A. Presser, T. Ross and D. A. Ratkowsky, *Appl. Environ. Microbiol.*, 1998, **64**, 1773–1779.
- 16 D. R. Lide, Ed., *CRC Handbook of Chemistry and Physics, 84th edition*, CRC Press, 84th edn., 2004.
- 17 K. G. Schulz, U. Riebesell, B. Rost, S. Thoms and R. E. Zeebe, *Mar. Chem.*, 2006, **100**, 53–65.
- 18 P. W. Atkins, *Physical Chemistry*, Oxford University Press, 4th edn., 1990.



- 19 R. E. Zeebe, *Geochim. Cosmochim. Acta*, 2011, **75**, 2483–2498.
- 20 P. Han and D. M. Bartels, *J. Phys. Chem.*, 1996, **100**, 5597–5602.
- 21 Ulf Riebesell, Victoria J. Fabry, Lina Hansson and Jean-Pierre Gattuso, *Guide to best practices for ocean acidification research and data reporting*, 2011.
- 22 R. F. Weiss, *Deep. Res. Oceanogr. Abstr.*, 1970, **17**, 721–735.
- 23 T. E. Crozier and S. Yamamoto<sup>1</sup>, *Solubility of Hydrogen in Water, Seawater, and NaCl Solutions*, 1974, vol. 19.
- 24 H. Yang, J. J. Kaczur, S. D. Sajjad and R. I. Masel, *J. CO<sub>2</sub> Util.*, 2017, **20**, 208–217.
- 25 A. Buttler and H. Spliethoff, *Renew. Sustain. Energy Rev.*, 2018, **82**, 2440–2454.
- 26 A. Morão and F. de Bie, *J. Polym. Environ.*, 2019, **27**, 2523–2539.
- 27 N. J. Claassens, C. A. R. Cotton, D. Kopljar and A. Bar-Even, *Nat. Catal.*, 2019, **2**, 437–447.
- 28 A. Flamholz, E. Noor, A. Bar-Even and R. Milo, *Nucleic Acids Res.*, 2012, **40**, DOI:10.1093/nar/gkr874.
- 29 R. O. N. Grosz and G. Stephanopoulos, *Biotechnol. Bioeng.*, 1983, **25**, 2149–2163.
- 30 C. Liu, B. C. Colón, M. Ziesack, P. A. Silver and D. G. Nocera, *Science*, 2016, **352**, 1210–1213.
- 31 V. Hábová, K. Melzoch, M. Rychtera and B. Sekavová, *Desalination*, 2004, **162**, 361–372.
- 32 P. L. McCarty, *Biotechnol. Bioeng.*, 2006, **97**, 377–388.
- 33 K. Schuchmann and V. Müller, *Nat. Rev. Microbiol.*, 2014, **12**, 809–821.
- 34 P. L. Tremblay, D. Höglund, A. Koza, I. Bonde and T. Zhang, *Sci. Rep.*, 2015, **5**, 16168.
